# Supplementary material
Source: PubMed Central journal article supplement (PMC7927875)
Supplement: AAC.01508-20-s0001.pdf [file AAC.01508-20-s0001.pdf]

## Supplemental figures

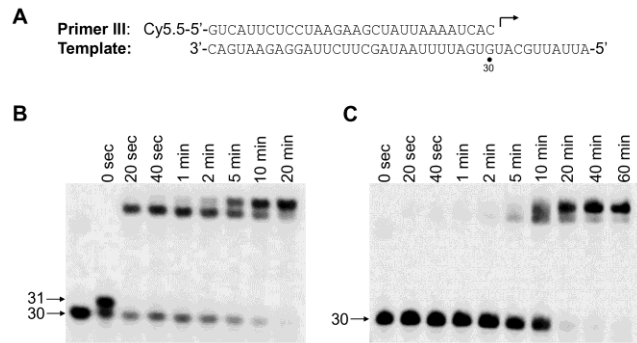

**Fig. S1. Time-course analysis of RNA synthesis catalyzed by RdRp.** (A) P/T used in this assay. (B) Time-course analysis of RNA synthesis with preformed RNA/RdRp complex. Nsp12 (50 nM) and nsp8-7 (2  $\mu$ M) were incubated with 5 nM P/T and 0.1  $\mu$ M ATP (the first nucleotide to be incorporated) in reaction buffer for 30 min at 37  $^{\circ}$ C to allow the first nucleotide incorporation, which promotes the complete formation of RNA/RdRp complex. After cool down to 22  $^{\circ}$ C, NTP (100  $\mu$ M) was added to reaction mixture and aliquots (5  $\mu$ l) was taken from the reaction mixture at different time indicated above each lane after adding NTP and mixed with 10  $\mu$ l stopping solution. The products were resolved by denaturing PAGE. (C) Time-course analysis of RNA synthesis without preformed RNA/RdRp complex. Nsp12 (50 nM) and nsp8-7 (2  $\mu$ M) were incubated with 5 nM P/T and 100  $\mu$ M NTP in reaction buffer at 22  $^{\circ}$ C, and aliquots (5  $\mu$ l) was taken from the reaction mixture at different time indicated above each lane after adding NTP and mixed with 10  $\mu$ l stopping solution. The products were resolved by denaturing PAGE.

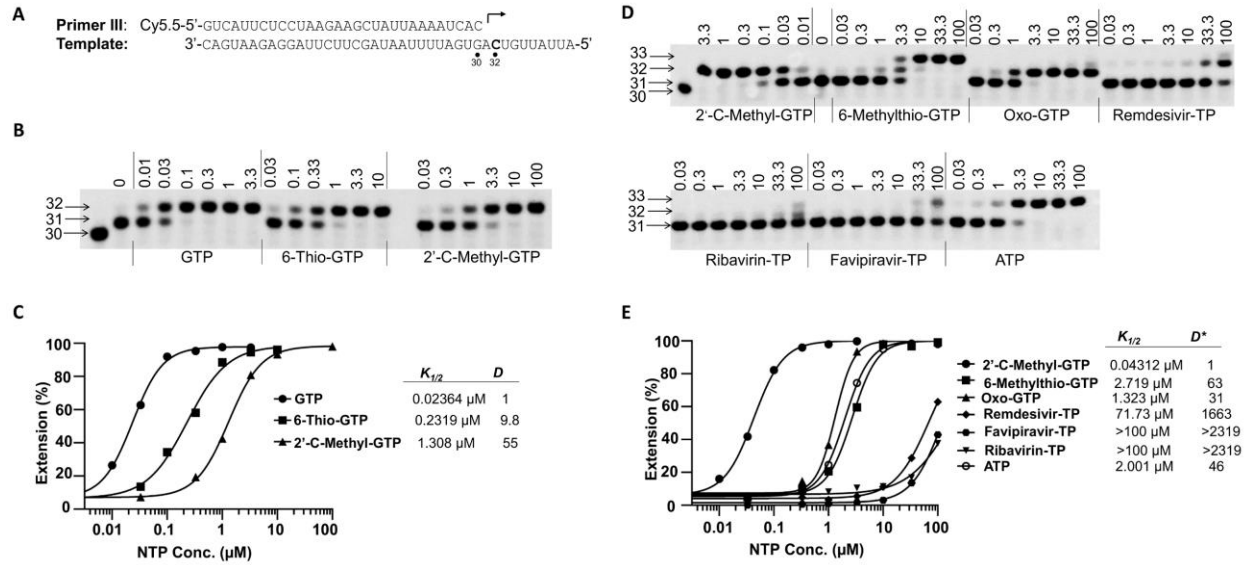

**Fig. S2. Measurement of the discrimination value of GTP analogs.** (A) The primer and template used to assay GTP analog shown in panel B and D. (B) A representative image of the results of the analysis of  $D_{6\text{-Thio-GTP}}$  and  $D_{2'\text{-C-methyl-GTP}}$  values. Nsp12 (50 nM), and nsp8-7 (2  $\mu\text{M}$ ) were incubated with 5 nM P/T and 0.1  $\mu\text{M}$  UTP (the first nucleotide to be incorporated) in reaction buffer for 30 min at 37 °C and then rapidly mixed with different concentrations (in micromolar) of GTP, 6-Thio-GTP or 2'-C-methyl-GTP, as indicated above each lane. The reactions were continued at 22 °C for 20 s before the addition of stopping solution, and the products were resolved by denaturing PAGE. The identity of the tested nucleotide is indicated at the bottom of the gel. The location of 30-mer primer and 31-mer and 32-mer (first and second nucleotide extension products, respectively) are indicated on the left of the gel. (C) Quantitative analysis of GTP, 6-Thio-GTP, and 2'-C-methyl-GTP incorporation in the assay whose results are shown in panel B. The incorporation efficiency was evaluated based on the extension of 31-mer to 32-mer products. The measured  $K_{1/2}$  values for GTP, 6-Thio-GTP, and 2'-C-methyl-GTP in this experiment were 0.02364  $\mu\text{M}$ , 0.2319  $\mu\text{M}$  and 1.308  $\mu\text{M}$ , respectively. The discrimination values were calculated using the equation as  $K_{1/2, \text{GTP analog}}/K_{1/2, \text{GTP}}$  and are shown on the right of the graph. (D) A representative image of the result of the analysis of GTP analogs. Primer extension reactions were performed using a similar method described in Panel B. After adding different concentrations of GTP analog, the reactions were continued at 22 °C for 15 min before adding stopping solution. (E) Quantitative analysis of GTP analogs incorporation in the assay whose results are shown in panel D.  $K_{1/2}$  analysis is as same as described in panel B and C. The discrimination between GTP analog and 2'-C-Methyl-GTP,  $D^*_{\text{GTP analog}}$ , was calculated as  $K_{1/2, \text{GTP analog}}/K_{1/2, 2'\text{-C-methyl-GTP}}$ , and the values are shown on the right of the graph. The discrimination between GTP analogs and natural GTP,  $D^{cal}_{\text{GTP analog}}$  was calculated as  $D^*_{\text{GTP analog}} \times D_{2'\text{-C-Methyl-GTP}}$ .  $D_{2'\text{-C-Methyl-GTP}}$  is  $61.7 \pm 9.0$  (average of 2 independent experiments, one is shown in panel C). For 6-methylthio-GTP, Oxo-GTP, remdesivir-TP, ribavirin-TP, favipiravir-TP and ATP (mis-incorporated as GTP) calculated values of  $D^{cal}_{\text{analog}}$  were  $4516 \pm 884$ ,  $2317 \pm 600$ ,  $110222 \pm 10726$ ,  $>143089$ ,  $>143089$  and  $3427 \pm 797$ , respectively (average of 2 independent experiments, one is shown in this figure).

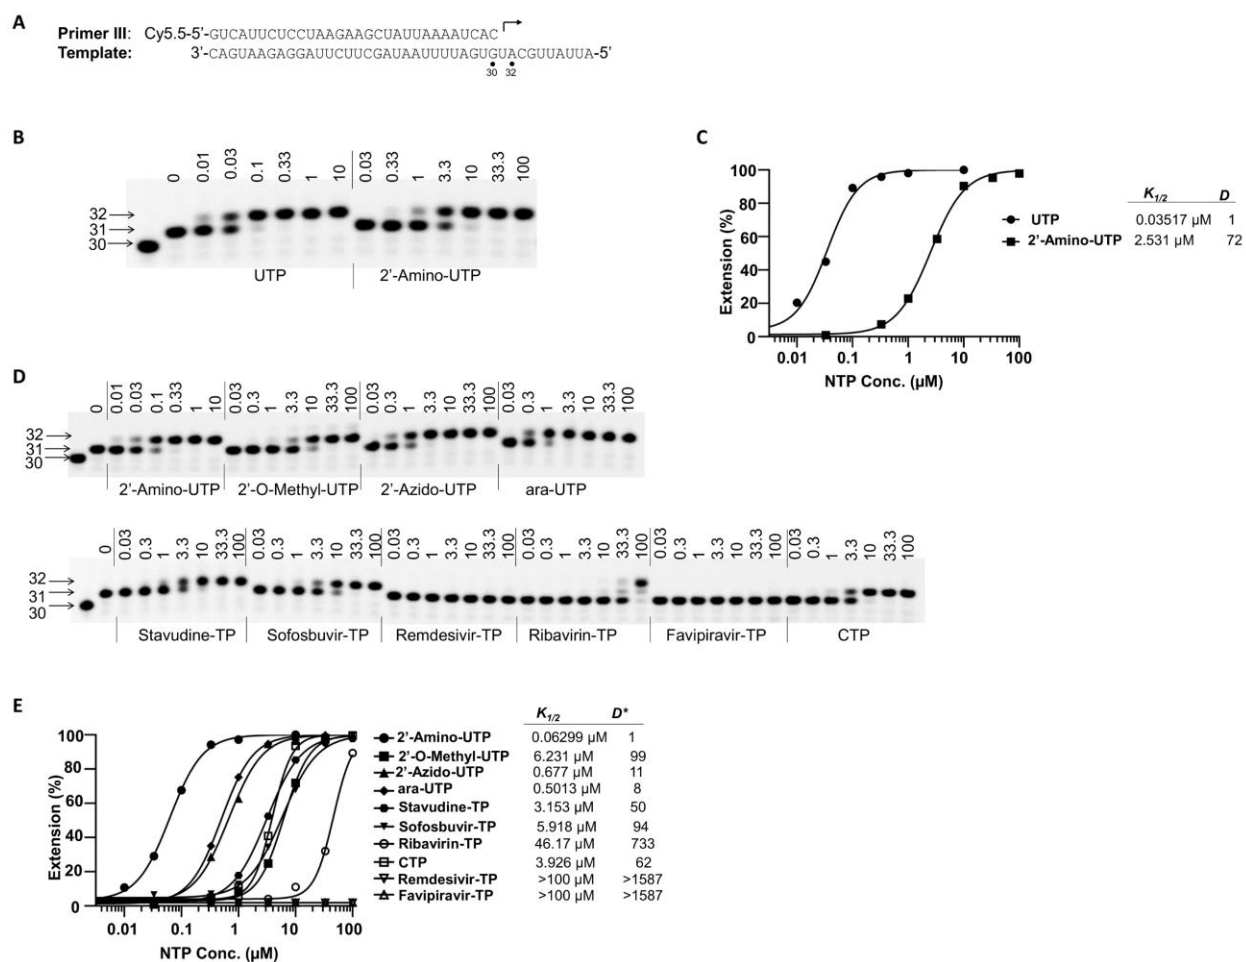

**Fig. S3. Measurement of the discrimination value of UTP analogs.** (A) The primer and template used to assay UTP analog shown in panel B and D. (B) A representative image of the results of the analysis of  $D_{2'-\text{amino-UTP}}$  values. Nsp12 (50 nM), and nsp8-7 (2 µM) were incubated with 5 nM P/T and 0.1 µM ATP (the first nucleotide to be incorporated) in reaction buffer for 30 min at 37 °C and then rapidly mixed with different concentrations (in micromolar) of UTP, 2'-Amino-UTP, as indicated above each lane. The reactions were continued at 22 °C for 20 s before the addition of stopping solution, and the products were resolved by denaturing PAGE. The identity of the tested nucleotide is indicated at the bottom of the gel. The location of 30-mer primer, and 31-mer and 32-mer (first and second nucleotide extension products, respectively) are indicated on the left of the gel. (C) Quantitative analysis of UTP, 2'-amino-UTP incorporation in the assay whose results are shown in panel B. The incorporation efficiency was evaluated based on the extension of 31-mer to 32-mer products. The measured  $K_{1/2}$  values for UTP, 2'-amino-UTP in this experiment were 0.03517 µM and 2.531 µM, respectively. The discrimination values were calculated using the equation as  $K_{1/2, \text{UTP analog}}/K_{1/2, \text{UTP}}$  and are shown on the right of the graph. (D) A representative image of the result of the analysis of UTP analogs. Primer extension reactions were performed using a similar method described in Panel B. After adding different concentrations of UTP analog, the reactions were continued at 22 °C for 15 min before adding stopping solution. (E) Quantitative analysis of UTP analogs incorporation in the assay whose results are shown in panel D.  $K_{1/2}$  analysis is as same as described in panel B and C. The

discrimination between UTP analog and 2'-amino-UTP,  $D^*_{\text{UTP analog}}$ , was calculated as  $K_{1/2, \text{UTP analog}}/K_{1/2, 2'\text{-amino-UTP}}$ , and the values are shown on the right of the graph. The discrimination between UTP analogs and natural UTP,  $D^{cal}_{\text{UTP analog}}$  was calculated as  $D^*_{\text{UTP analog}} \times D_{2'\text{-amino-UTP}}$ .  $D_{2'\text{-amino-UTP}}$  is  $75 \pm 5$  (average of 2 independent experiments, one is shown in panel C). For 2'-O-methyl-UTP, 2'-azido-UTP, ara-UTP, stavudine-TP, sofosbuvir-TP, ribavirin-TP and CTP (misincorporated as UTP) calculated values of  $D^{cal}_{\text{UTP analog}}$  were  $7688 \pm 380$ ,  $831 \pm 35$ ,  $625 \pm 40$ ,  $4109 \pm 502$ ,  $7307 \pm 368$ ,  $61933 \pm 9843$  and  $5131 \pm 645$ , respectively (average of 2 independent experiments, one is shown in this figure).

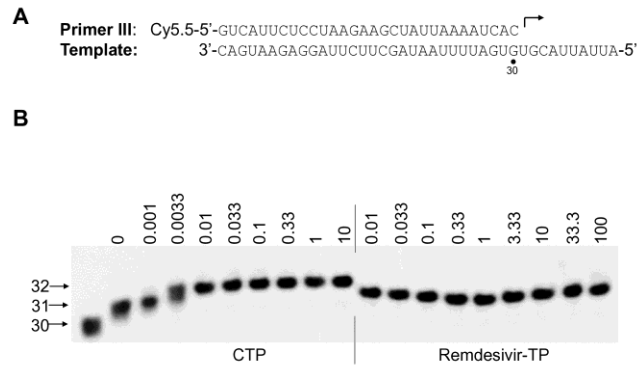

**Fig. S4.** Remdesivir-TP cannot be incorporated as CTP analog. **(A)** The primer and template used to assay CTP analog shown in panel B. **(B)** Image of the analysis of remdesivir-TP as CTP analog. Nsp12 (50 nM), and nsp8-7 (2  $\mu$ M) were incubated with 5 nM P/T and 0.1  $\mu$ M ATP (the first nucleotide to be incorporated) in reaction buffer for 30 min at 37 °C and then rapidly mixed with different concentrations (in micromolar) of CTP or remdesivir-TP, as indicated above each lane. The reactions were continued at 22 °C for 20 min before the addition of stopping solution, and the products were resolved by denaturing PAGE. The identity of the tested nucleotide is indicated at the bottom of the gel. The location of 30-mer primer, and 31-mer and 32-mer (first and second nucleotide extension products, respectively) are indicated on the left of the gel.

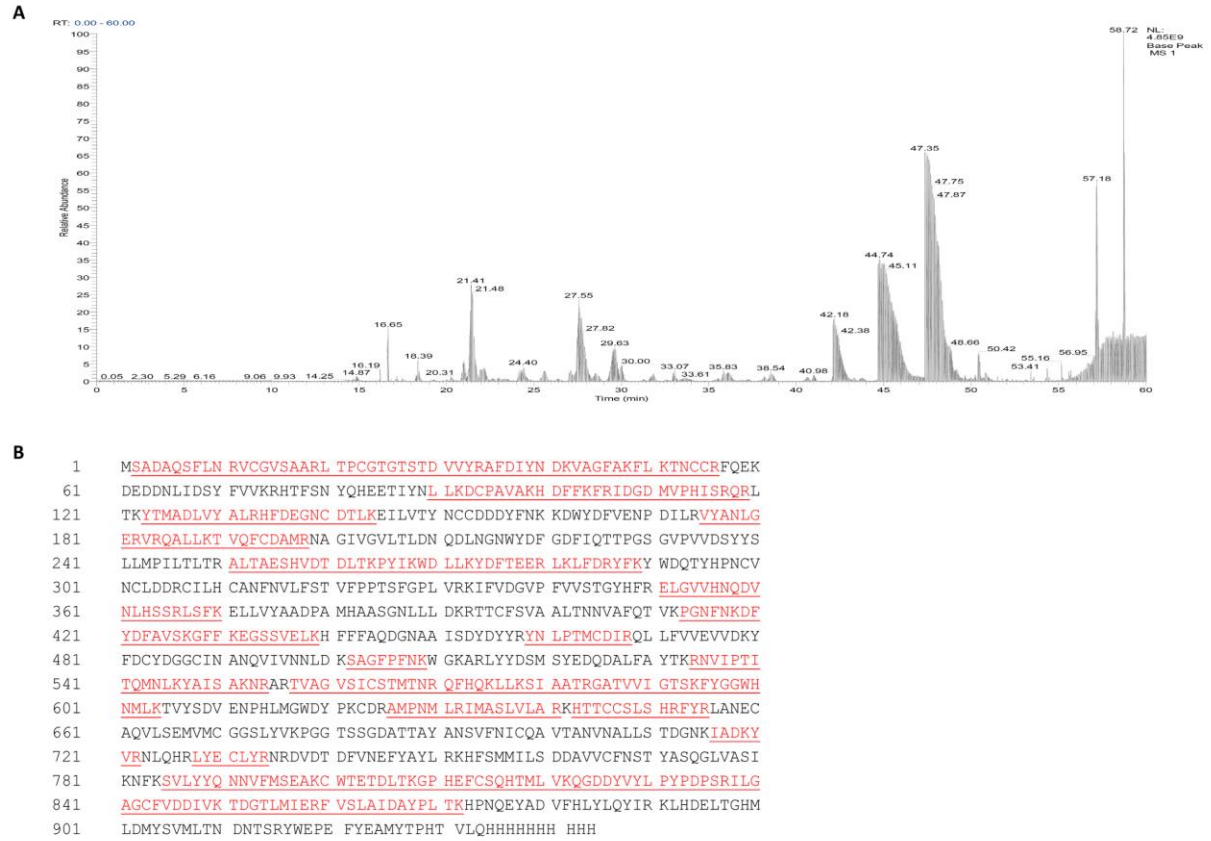

**Fig. S5. LC-MS/MS identification of nsp12.** (A) Fragment ion spectra of nsp12 after in-gel trypsin digestion. (B) Sequence coverage of nsp12. The identified sequence was labeled with red color. Total coverage rate of nsp12 sequence was 45.8%.

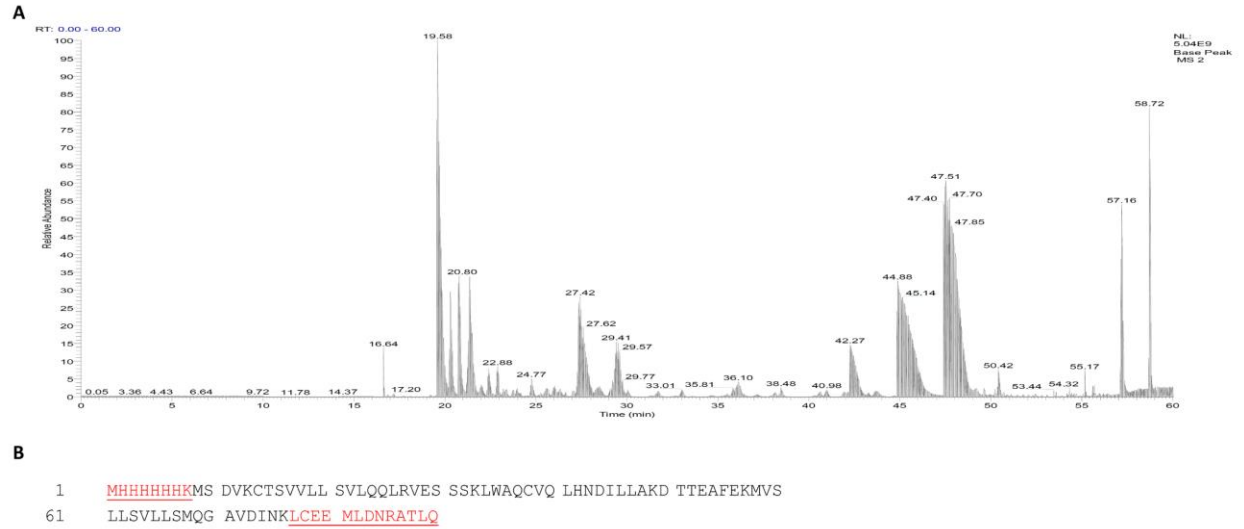

**Fig. S6. LC-MS/MS identification of nsp7.** (A) Fragment ion spectra of nsp7 after in-gel trypsin digestion. (B) Sequence coverage of nsp7. The identified sequence was labeled with red color. Total coverage rate of nsp7 sequence was 23.6%.

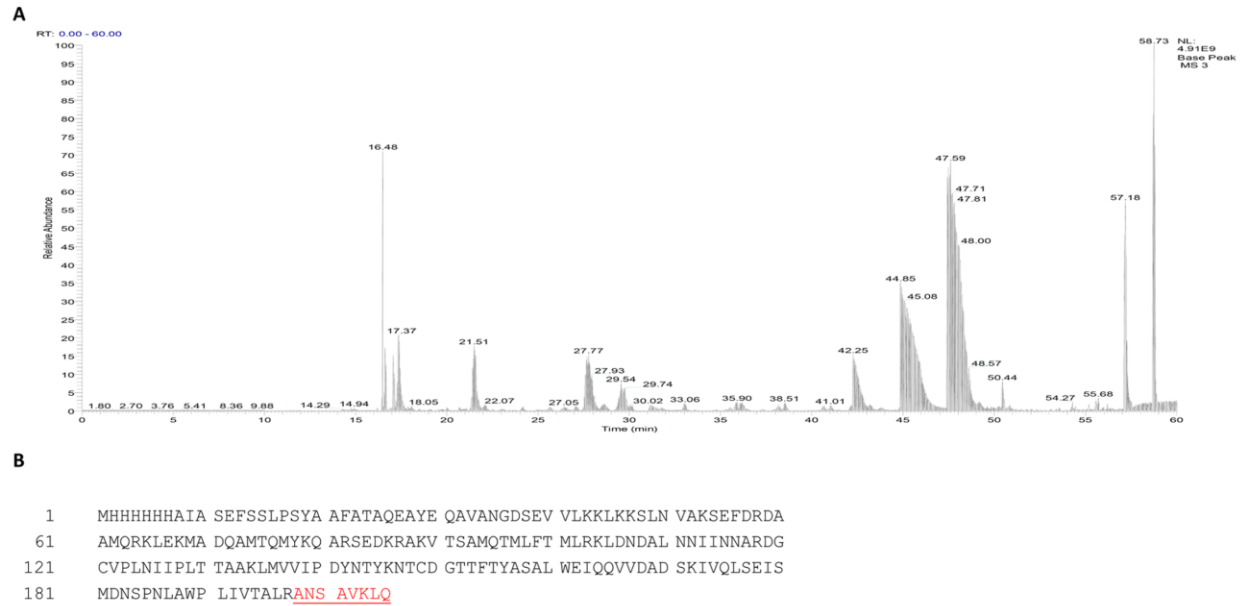

**Fig. S7. LC-MS/MS identification of nsp8.** (A) Fragment ion spectra of nsp8 after in-gel trypsin digestion. (B) Sequence coverage of nsp8. The identified sequence was labeled with red color. Total coverage rate of nsp8 sequence was 3.9%.
